# Supplementary material for: Stabilization of the first-order phase transition character and enhancement of the electrocaloric effect by Na0.5Bi0.5TiO3 substitution in BaTiO3 ceramics
Source: Royal Society of Chemistry journal article supplement (doi:10.1039/d4tc01735h), 2024-01-01
Supplement: d4tc01735h1.pdf [file d4tc01735h1.pdf]

SUPPLEMENTARY INFORMATION

for

**Stabilization of the first-order phase transition character  
and Enhancement of the Electrocaloric Effect by NBT  
substitution in BaTiO<sub>3</sub> ceramics**

**Merve Karakaya<sup>a</sup>, İrem Gürbüz<sup>a,b</sup>, Lovro Fulanovic<sup>c</sup>, Umut Adem<sup>a</sup>**

<sup>a</sup>Department of Materials Science and Engineering, İzmir Institute of Technology, Urla, 35430, İzmir  
Turkey

<sup>b</sup>Department of Chemistry, Aix-Marseille University, 52 Avenue Escadrille Normandie Niemen, 13013,  
Marseille, France.

<sup>c</sup>Nonmetallic Inorganic Materials, Department of Materials and Earth Sciences, Technical University of  
Darmstadt, Peter-Grünberg-Straße 2, 64287 Darmstadt, Germany

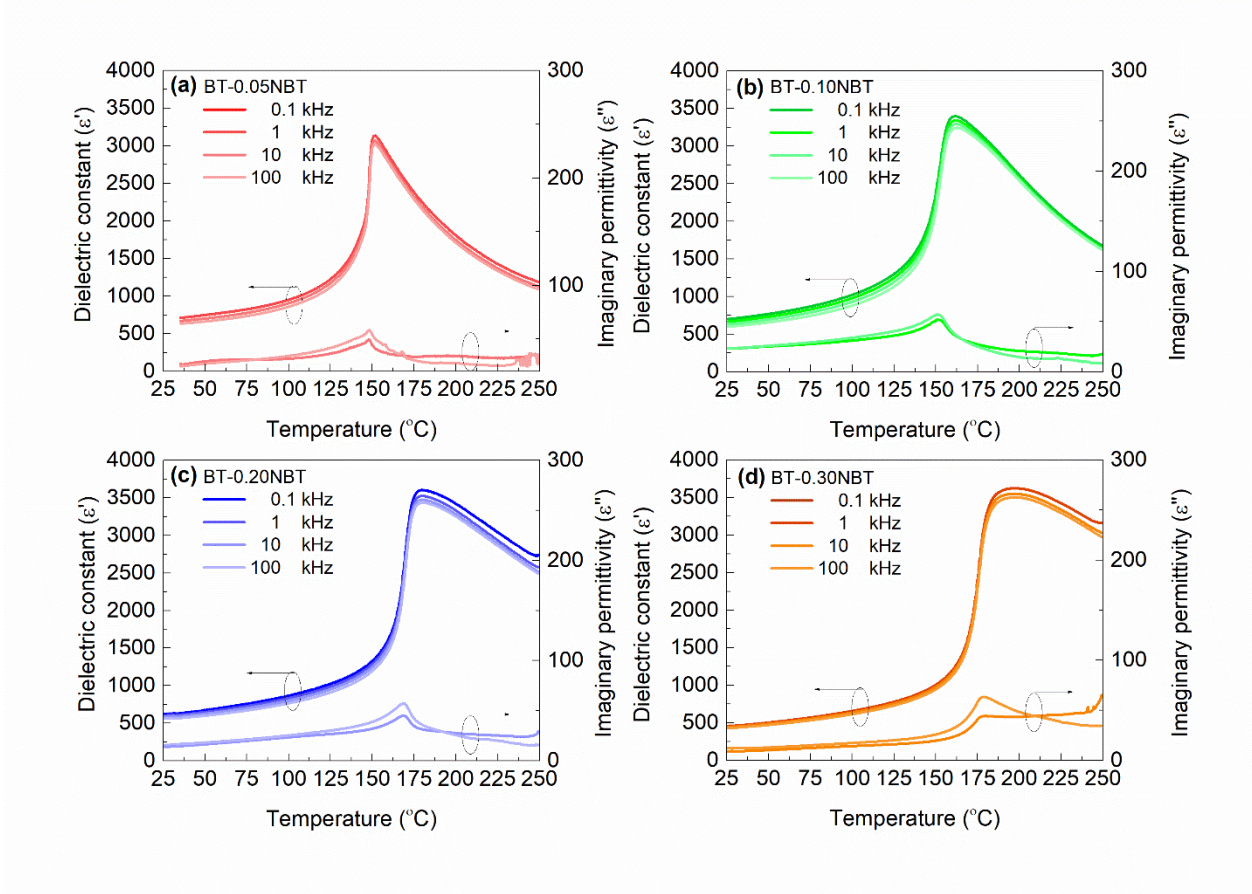

**Fig. S1.** Temperature dependence of the dielectric constant and imaginary permittivity at 0.1, 1, 10 and 100 kHz of  $(1-x)\text{BaTiO}_3-x\text{Na}_{0.5}\text{Bi}_{0.5}\text{TiO}_3$  samples: (a)  $x = 0.05$ , (b)  $x = 0.10$ , (c)  $x = 0.20$ , (d)  $x = 0.30$ .

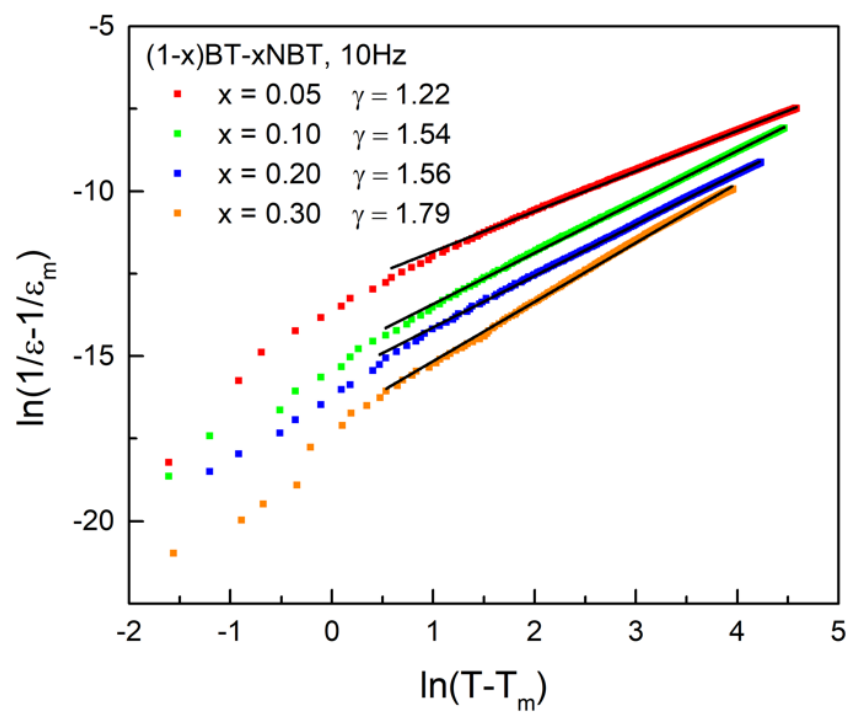

**Fig. S2.** The plot of  $\ln(1/\epsilon - 1/\epsilon_m)$  as a function of  $\ln(T - T_m)$  for all compositions, showing  $\gamma$  coefficients and linear fits.

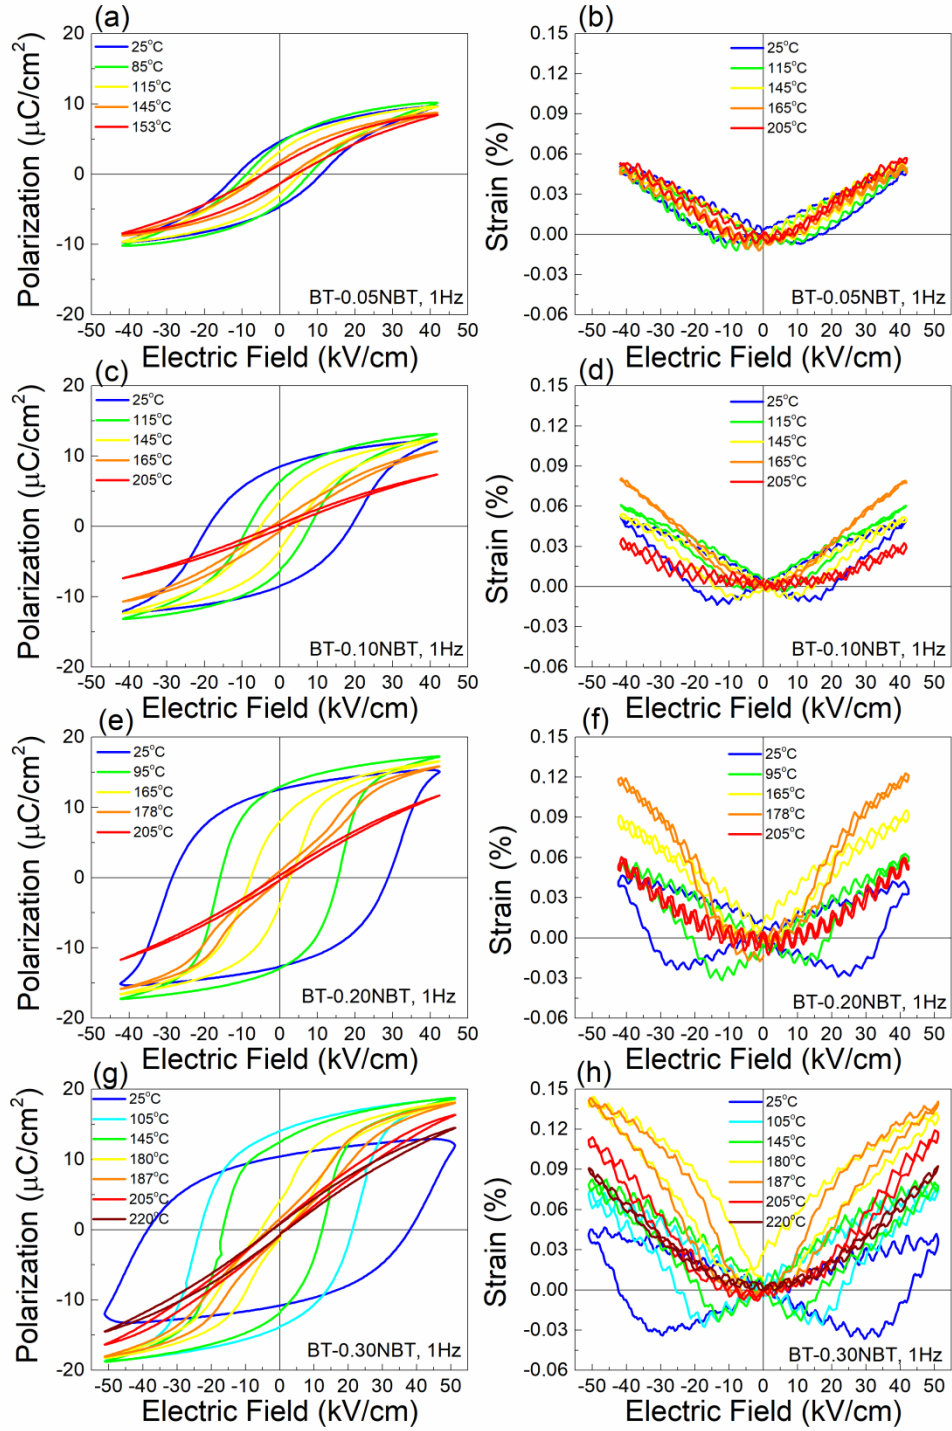

**Fig. S3.** Temperature dependent P(E) hysteresis loops and strain-electric field curves at selected temperatures. (a, b)  $x = 0.05$ , (c, d)  $x = 0.10$ , (e, f)  $x = 0.20$ , (g, h)  $x = 0.30$ .

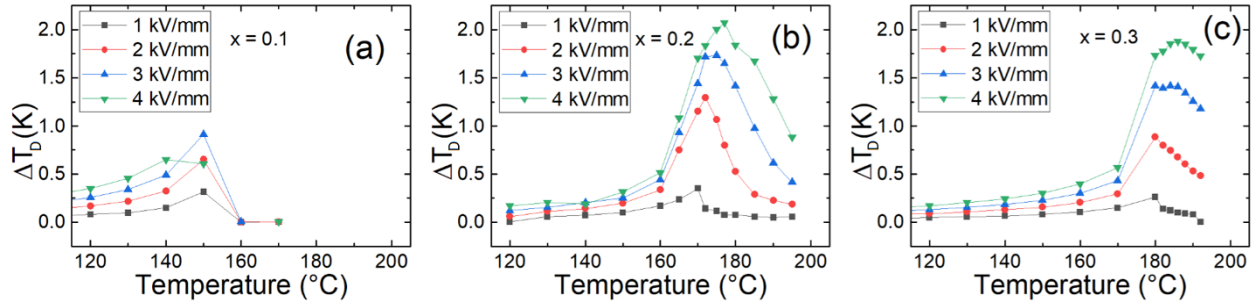

**Fig. S4.** Temperature and electric field dependence of directly measured  $\Delta T_D$  for (a)  $x = 0.1$ , (b)  $x = 0.2$  and (c)  $x = 0.3$  samples.

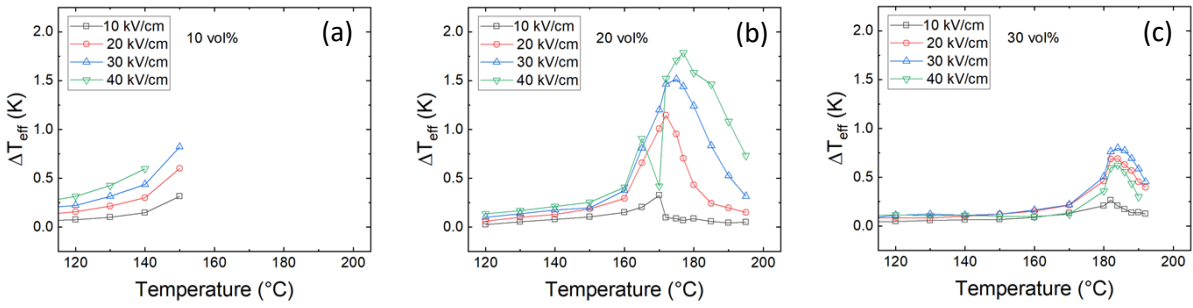

**Fig. S5.** Temperature and electric field dependence of directly measured effective EC cooling  $\Delta T_{\text{eff}}$  for (a)  $x = 0.1$ , (b)  $x = 0.2$  and (c)  $x = 0.3$  samples.  $\Delta T_{\text{eff}} = \Delta T_D - \Delta T_{\text{JH}}$

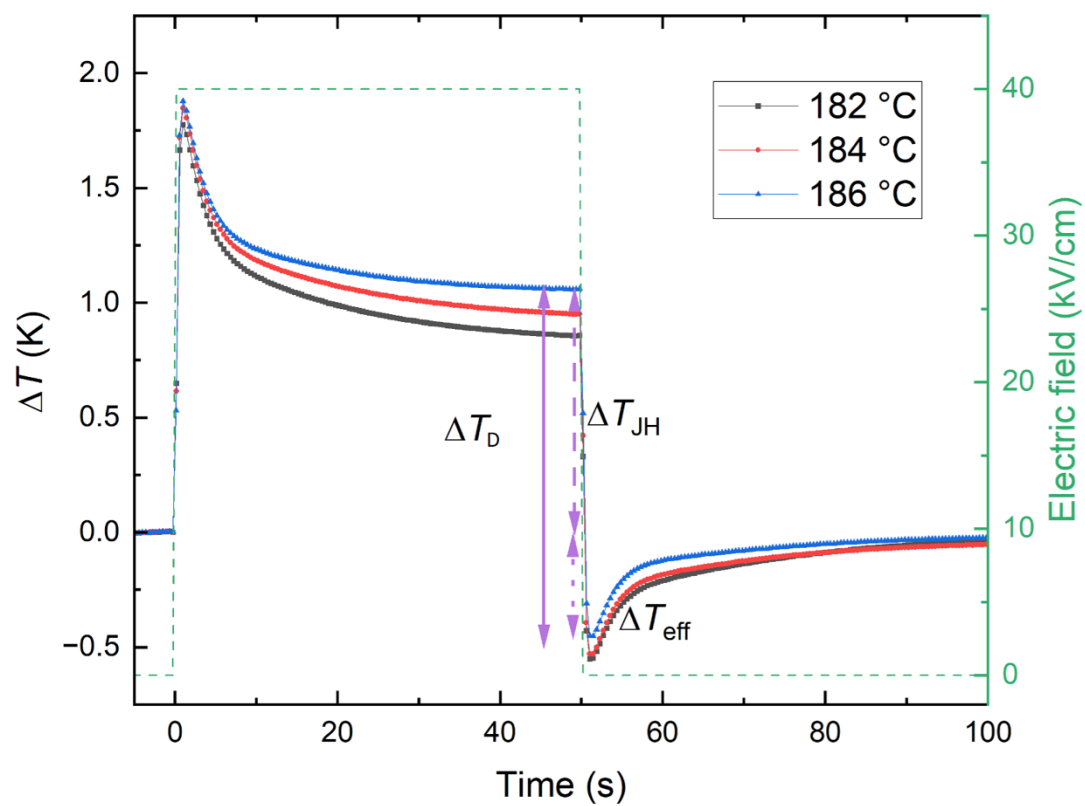

**Fig. S6.** Directly measured  $\Delta T$  for 0.7BT-0.3NBT sample close to the dielectric maximum temperature as a function of time as the electric field was turned on and off.  $\Delta T_D$  is the sum of the maximum effective EC cooling ( $\Delta T_{\text{eff}}$ ) and the Joule heating ( $\Delta T_{\text{JH}}$ ).

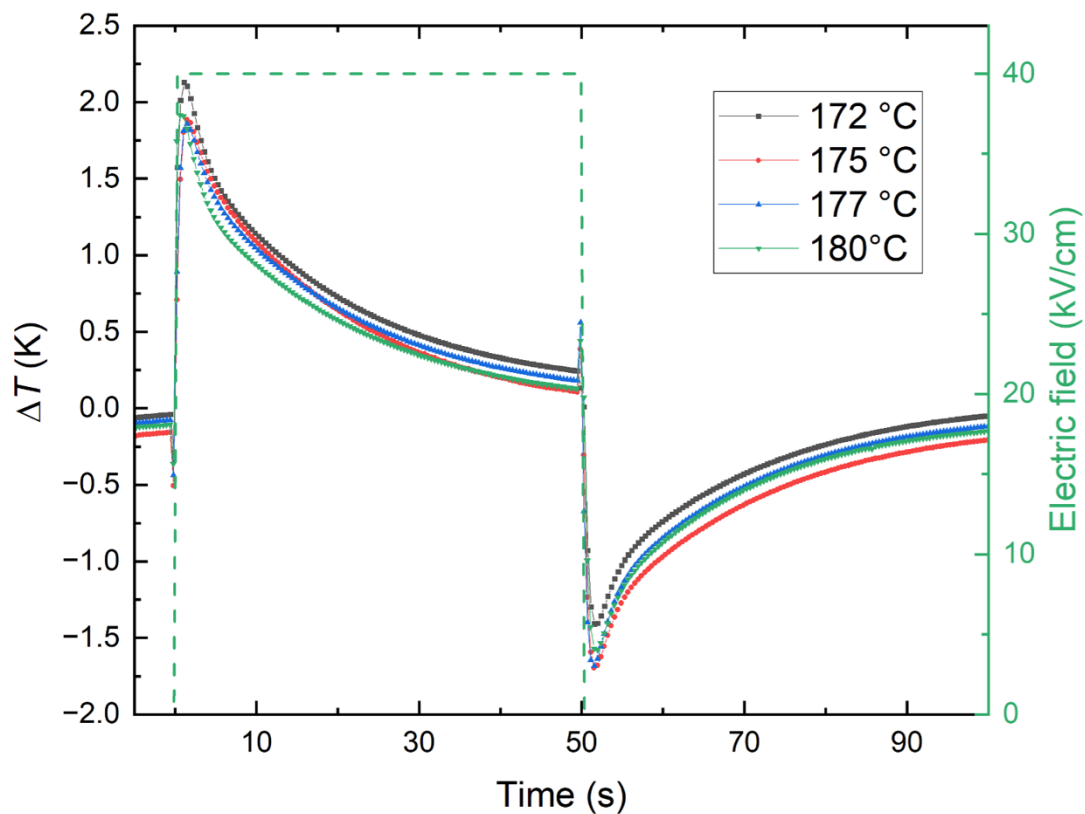

**Fig. S7.** Directly measured  $\Delta T$  for 0.8BT-0.2NBT sample close to the dielectric maximum temperature as a function of time as the electric field was turned on and off.

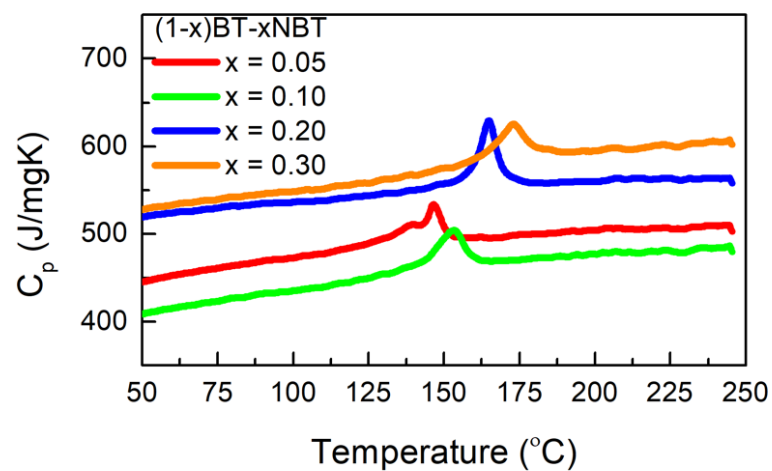

**Fig. S8.** Temperature dependence of specific heat of  $(1-x)\text{BaTiO}_3-x\text{Na}_{0.5}\text{Bi}_{0.5}\text{TiO}_3$  samples.

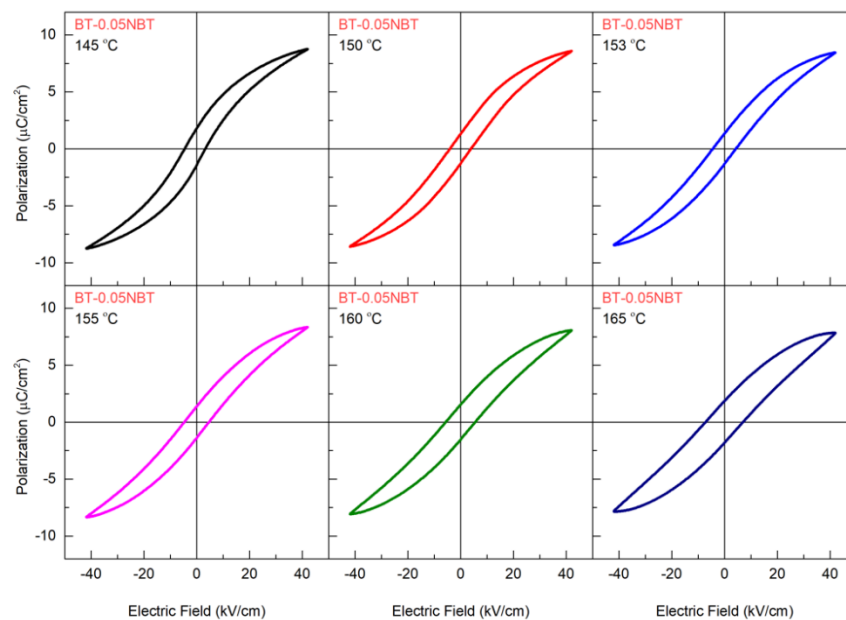

**Fig. S9.** P(E) hysteresis loops of 0.95BT-0.05NBT at and slightly above  $T_C$ .

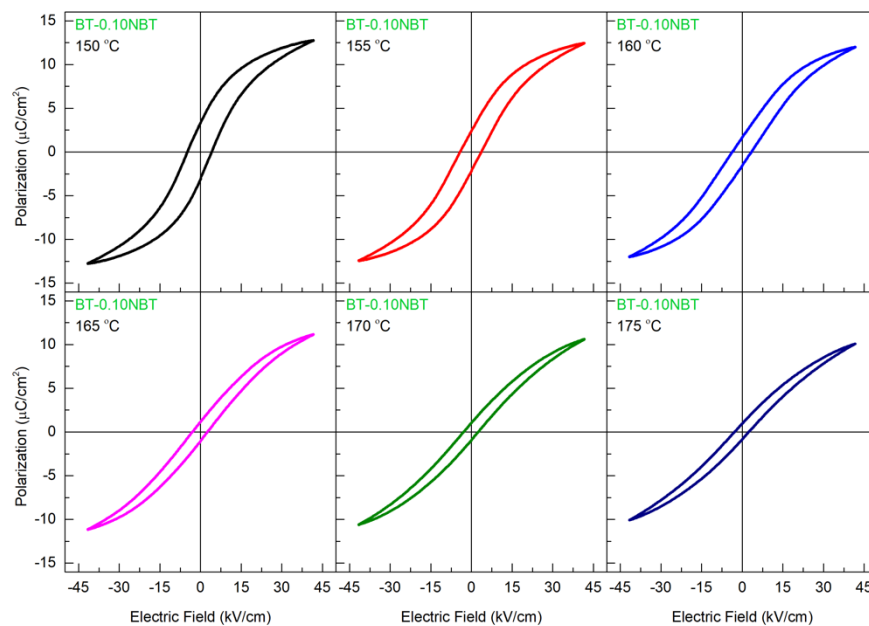

**Fig. S10.** P(E) hysteresis loops of 0.9BT-0.1NBT at and slightly above  $T_C$ .



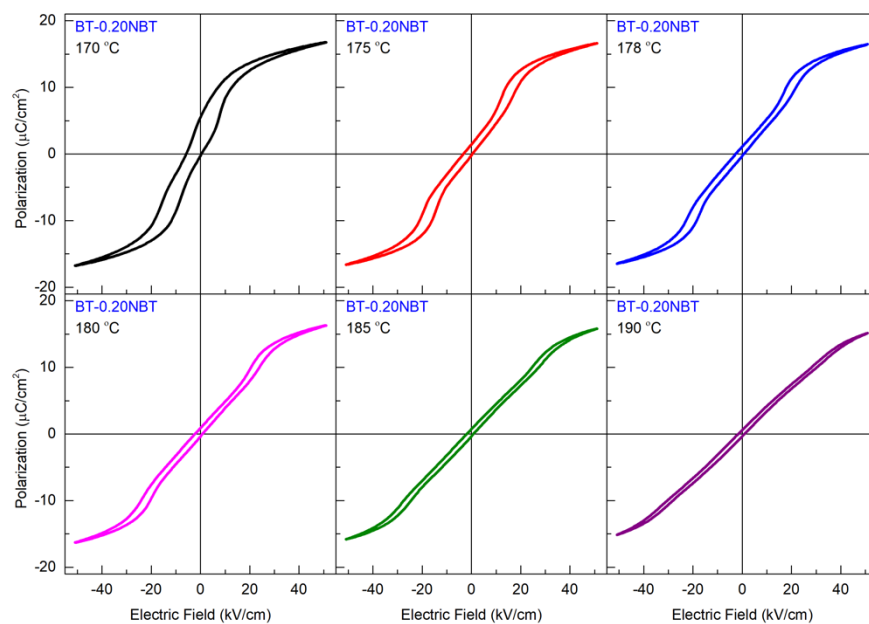

**Fig. S11.** P(E) hysteresis loops of 0.8BT-0.2NBT at and slightly above  $T_C$ .

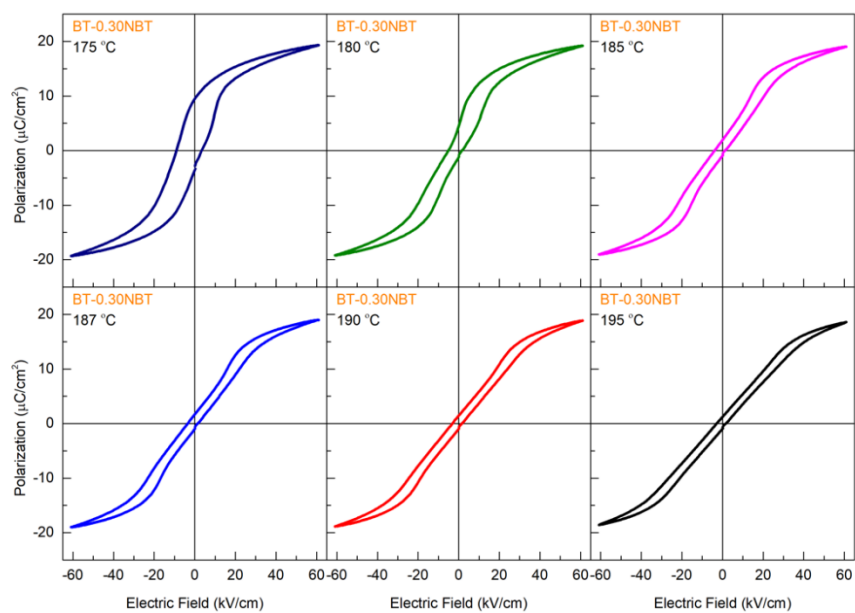

**Fig. S12.** P(E) hysteresis loops of 0.7BT-0.3NBT at and slightly above  $T_C$ .
